# Supplementary material for: The performance of anthropometric tools to determine obesity: a systematic review and meta-analysis
Source: PubMed Central journal article supplement (PMC7391719; doi:10.1038/s41598-020-69498-7), 2020-07-29
Supplement: 41598_2020_69498_MOESM1_ESM.pdf [file 41598_2020_69498_MOESM1_ESM.pdf]

## **Supplementary files: The performance of anthropometric tools to determine obesity: a systematic review and meta-analysis**

Isolde Sommer<sup>1\*</sup>, Birgit Teufer<sup>1</sup>, Monika Szelag<sup>1</sup>, Barbara Nussbaumer-Streit<sup>1</sup>, Viktoria Titscher<sup>1</sup>, Irma Klerings<sup>1</sup>, Gerald Gartlehner<sup>1,2</sup>

<sup>1</sup>Department for Evidence-based Medicine and Evaluation, Danube University Krems, Dr.-Karl-Dorrek-Straße 30, 3500 Krems, Austria

<sup>2</sup>RTI-UNC Evidence-based Practice Center, Research Triangle Institute International, East Cornwallis Road, Post Office Box 12194, Research Triangle Park, North Carolina 27709-2194, USA

Supplementary file 1: Search strategies of the all electronic databases that were searched.

Ovid MEDLINE(R) 1946 to January Week 1 2018, Ovid MEDLINE(R) Epub Ahead of Print January 15, 2018, Ovid MEDLINE(R) In-Process & Other Non-Indexed Citations January 15, 2018, Ovid MEDLINE(R) Daily Update January 15, 2018

Ovid/MEDLINE, 16 Jan 2018

| #  | Search                                                                                                                                                          | Results |
|----|-----------------------------------------------------------------------------------------------------------------------------------------------------------------|---------|
| 1  | exp *Overweight/                                                                                                                                                | 150701  |
| 2  | exp *Body Composition/                                                                                                                                          | 24297   |
| 3  | (overweight or obes* or adipos*).ti,kf.                                                                                                                         | 171009  |
| 4  | ((body adj (fat or composition)) or fat distribution).ti,kf.                                                                                                    | 17989   |
| 5  | or/1-4                                                                                                                                                          | 234385  |
| 6  | *body mass index/ or exp *waist circumference/ or exp *waist-height ratio/ or *waist-hip ratio/                                                                 | 20914   |
| 7  | (BMI or body mass index).ti,kf.                                                                                                                                 | 23802   |
| 8  | (waist adj2 (hip or height or circumference)).ti,kf.                                                                                                            | 3273    |
| 9  | anthropometr*.ti,kf.                                                                                                                                            | 10026   |
| 10 | (BMI or body mass index or (waist adj2 (hip or height or circumference)) or anthropometr*).ab. /freq=5                                                          | 36349   |
| 11 | or/6-10                                                                                                                                                         | 60437   |
| 12 | 5 and 11                                                                                                                                                        | 28680   |
| 13 | Tomography, X-Ray Computed/                                                                                                                                     | 383882  |
| 14 | Magnetic Resonance Imaging/                                                                                                                                     | 391861  |
| 15 | Absorptiometry, Photon/                                                                                                                                         | 23300   |
| 16 | Ultrasonography/                                                                                                                                                | 181882  |
| 17 | ((comput* adj2 tomograph*) or magnetic resonance imaging or MRI or (dual energy adj2 absorptiometry) or DXA or DEXA or ultrasound or Ultrasonograph*).ti,ab,kf. | 864734  |

|    |                                                                                                                             |          |
|----|-----------------------------------------------------------------------------------------------------------------------------|----------|
| 18 | exp "sensitivity and specificity"/ or predict*.ti. or diagnos*.ti. or accura*.ti. or validat*.ti. or Validation Studies.pt. | 1431094  |
| 19 | exp *Overweight/di, dg or exp *Body Composition/an, ph                                                                      | 9293     |
| 20 | or/13-19                                                                                                                    | 2522263  |
| 21 | 12 and 20                                                                                                                   | 6368     |
| 22 | exp animals/ not exp humans/                                                                                                | 4816547  |
| 23 | 21 not 22                                                                                                                   | 6356     |
| 24 | exp age groups/ not exp adult/                                                                                              | 1879844  |
| 25 | 23 not 24                                                                                                                   | 5080     |
| 26 | limit 25 to yr="2000 -Current"                                                                                              | 4718     |
| 27 | (english or german).lg.                                                                                                     | 26328480 |
| 28 | 26 and 27                                                                                                                   | 4567     |
| 29 | remove duplicates from 28                                                                                                   | 4051     |
| 30 | case report/ or (case? and (report* or series)).ti.                                                                         | 2156933  |
| 31 | comment/ or editorial/ or letter/ or (editorial or comment or letter or commentary).ti.                                     | 1806562  |
| 32 | 30 or 31                                                                                                                    | 3740080  |
| 33 | 29 not 32                                                                                                                   | 3927     |

Embase.com (Elsevier) 16 Jan 2018

| No. | Query                                                           | Results |
|-----|-----------------------------------------------------------------|---------|
| #1  | 'obesity'/de OR 'abdominal obesity'/de OR 'morbid obesity'/de   | 376466  |
| #2  | 'adipose tissue'/exp                                            | 147292  |
| #3  | 'body composition'/de                                           | 49592   |
| #4  | overweight:ti OR obes*:ti OR adipos*:ti                         | 187611  |
| #5  | 'body fat':ti OR 'body composition':ti OR 'fat distribution':ti | 18730   |
| #6  | #1 OR #2 OR #3 OR #4 OR #5                                      | 519980  |

|     |                                                                                                                                                                                                                 |         |
|-----|-----------------------------------------------------------------------------------------------------------------------------------------------------------------------------------------------------------------|---------|
| #7  | 'body mass'/exp/mj OR 'waist circumference'/exp/mj OR 'waist to height ratio'/exp/mj OR 'waist hip ratio'/exp/mj                                                                                                | 26139   |
| #8  | bmi:ti OR 'body mass index':ti                                                                                                                                                                                  | 24239   |
| #9  | (waist NEAR/2 (hip OR height OR circumference)):ti                                                                                                                                                              | 3105    |
| #10 | anthropometr*:ti                                                                                                                                                                                                | 9227    |
| #11 | #7 OR #8 OR #9 OR #10                                                                                                                                                                                           | 41042   |
| #12 | #6 AND #11                                                                                                                                                                                                      | 22973   |
| #13 | 'computer assisted tomography'/de OR 'x-ray computed tomography'/exp                                                                                                                                            | 658860  |
| #14 | 'nuclear magnetic resonance imaging'/exp                                                                                                                                                                        | 772925  |
| #15 | 'dual energy x ray absorptiometry'/exp                                                                                                                                                                          | 30369   |
| #16 | 'echography'/exp                                                                                                                                                                                                | 695977  |
| #17 | 'obesity'/dm_di OR 'abdominal obesity'/dm_di OR 'morbid obesity'/dm_di                                                                                                                                          | 6589    |
| #18 | 'adipose tissue'/exp/dm_di                                                                                                                                                                                      | 6       |
| #19 | ((comput* NEAR/2 tomograph*):ti,ab) OR 'magnetic resonance imaging':ti,ab OR mri:ti,ab OR (('dual energy' NEAR/2 absorptiometry):ti,ab) OR dxa:ti,ab OR dexa:ti,ab OR ultrasound:ti,ab OR ultrasonograph*:ti,ab | 1071514 |
| #20 | 'sensitivity and specificity'/exp OR 'validation study'/exp OR 'diagnostic test accuracy study'/exp                                                                                                             | 369404  |
| #21 | predict*:ti OR diagnos*:ti OR accura*:ti OR validat*:ti                                                                                                                                                         | 1148858 |
| #22 | #13 OR #14 OR #15 OR #16 OR #17 OR #18 OR #19 OR #20 OR #21                                                                                                                                                     | 3241846 |
| #23 | #12 AND #22                                                                                                                                                                                                     | 4785    |
| #24 | 'animal'/exp NOT 'human'/exp                                                                                                                                                                                    | 4973235 |
| #25 | #23 NOT #24                                                                                                                                                                                                     | 4764    |
| #26 | 'groups by age'/exp NOT 'adult'/exp                                                                                                                                                                             | 2474463 |
| #27 | #25 NOT #26                                                                                                                                                                                                     | 3922    |
| #28 | #27 AND [2000-2018]/py                                                                                                                                                                                          | 3645    |
| #29 | #28 AND ([english]/lim OR [german]/lim)                                                                                                                                                                         | 3512    |

|     |                                                                                               |         |
|-----|-----------------------------------------------------------------------------------------------|---------|
| #30 | #29 NOT 'conference abstract'/it                                                              | 2508    |
| #31 | 'case report'/exp OR 'case study'/exp OR ((case:ti OR cases:ti) AND (report:ti OR series:ti)) | 2400105 |
| #32 | 'editorial'/exp OR 'letter'/exp OR editorial:ti OR comment:ti OR letter:ti OR commentary:ti   | 1634560 |
| #33 | #31 OR #32                                                                                    | 3836125 |
| #34 | #30 NOT #33                                                                                   | 2378    |

CINAHL (Ebsco) 16 Jan 2018

| #   | Query                                                                                                                      | Limiters/Expanders                      | Results |
|-----|----------------------------------------------------------------------------------------------------------------------------|-----------------------------------------|---------|
| S1  | (MH "Obesity")                                                                                                             | Search modes - Find all my search terms | 38.073  |
| S2  | (MH "Body Composition+")                                                                                                   | Search modes - Find all my search terms | 11.969  |
| S3  | TI (overweight OR obes* OR adipos*) OR SU (overweight OR obes* OR adipos*)                                                 | Search modes - Find all my search terms | 54.673  |
| S4  | TI ("body fat" OR "body composition" or "fat distribution") OR SU ("body fat" OR "body composition" or "fat distribution") | Search modes - Find all my search terms | 11.143  |
| S5  | S1 OR S2 OR S3 OR S4                                                                                                       | Search modes - Find all my search terms | 61.911  |
| S6  | (MM "Body Mass Index") OR (MM "Waist Circumference") OR (MM "Waist-Hip Ratio")                                             | Search modes - Find all my search terms | 5.271   |
| S7  | TI (BMI OR "body mass index") OR SU (BMI OR "body mass index")                                                             | Search modes - Find all my search terms | 42.141  |
| S8  | TI (waist N1 (hip OR height OR circumference)) OR SU (waist N1 (hip OR height OR circumference))                           | Search modes - Find all my search terms | 3.343   |
| S9  | TI anthropometr*                                                                                                           | Search modes - Find all my search terms | 1.279   |
| S10 | S6 OR S7 OR S8 OR S9                                                                                                       | Search modes - Find all my search terms | 43.979  |
| S11 | S5 AND S10                                                                                                                 | Search modes - Find all my search terms | 17.687  |

|     |                                                                                                                                                         |                                                                         |         |
|-----|---------------------------------------------------------------------------------------------------------------------------------------------------------|-------------------------------------------------------------------------|---------|
| S12 | (MH "Tomography, X-Ray Computed") OR (MH "Magnetic Resonance Imaging") OR (MH "Absorptiometry, Photon") OR (MH "Ultrasonography")                       | Search modes - Find all my search terms                                 | 89.261  |
| S13 | (MH "Sensitivity and Specificity") OR (MH "Validation Studies")                                                                                         | Search modes - Find all my search terms                                 | 71.973  |
| S14 | (MH "Obesity/DI/RA/US") OR (MH "Body Composition+/CL")                                                                                                  | Search modes - Find all my search terms                                 | 1.23    |
| S15 | comput* N1 tomograph* OR ( "magnetic resonance imaging" OR MRI ) OR "dual energy" N1 absorptiometry OR ( DXA OR DEXA OR ultrasound OR Ultrasonograph* ) | Search modes - Find all my search terms                                 | 121.337 |
| S16 | TI predict* OR diagnos* OR accura* OR validat*                                                                                                          | Search modes - Find all my search terms                                 | 114.859 |
| S17 | S12 OR S13 OR S14 OR S15 OR S16                                                                                                                         | Search modes - Find all my search terms                                 | 292.649 |
| S18 | S11 AND S17                                                                                                                                             | Search modes - Find all my search terms                                 | 3.638   |
| S19 | (MH "Named Groups by Age+") NOT (MH "Adult+")                                                                                                           | Search modes - Find all my search terms                                 | 322.549 |
| S20 | S18 NOT S19                                                                                                                                             | Search modes - Find all my search terms                                 | 2.931   |
| S21 | S20                                                                                                                                                     | Limiters - Published Date: 20000101-20171231; Language: English, German | 2.798   |
| S22 | S21                                                                                                                                                     | Limiters - Exclude MEDLINE records                                      | 541     |

PubMed 16 Jan 2018

| Search | Query                                                                                | Items found |
|--------|--------------------------------------------------------------------------------------|-------------|
| #1     | Search (overweight[Title] OR obes*[Title] OR adipos*[Title])                         | 137850      |
| #2     | Search ("body fat"[Title] OR "body composition"[Title] OR "fat distribution"[Title]) | 14670       |
| #3     | Search (#1 OR #2)                                                                    | 150562      |

|     |                                                                                                                                                                                                                      |         |
|-----|----------------------------------------------------------------------------------------------------------------------------------------------------------------------------------------------------------------------|---------|
| #4  | Search (BMI[Title] OR "body mass index"[Title])                                                                                                                                                                      | 16285   |
| #5  | Search (waist[Title] AND (hip[Title] OR height[Title] OR circumference[Title]))                                                                                                                                      | 2221    |
| #6  | Search anthropometr*[Title]                                                                                                                                                                                          | 7343    |
| #7  | Search (#4 OR #5 OR #6)                                                                                                                                                                                              | 24956   |
| #8  | Search (#3 AND #7)                                                                                                                                                                                                   | 3483    |
| #9  | Search (comput*[tiab] AND tomograph*[tiab]) OR magnetic resonance imaging[tiab] OR MRI[tiab] OR (dual energy[tiab] AND absorptiometry[tiab]) OR DXA[tiab] OR DEXA[tiab] OR ultrasound[tiab] OR Ultrasonograph*[tiab] | 787911  |
| #10 | Search (predict*[Title] OR diagnos*[Title] OR accura*[Title] OR validat*[Title])                                                                                                                                     | 881186  |
| #11 | Search (#9 OR #10)                                                                                                                                                                                                   | 1582294 |
| #12 | Search (#8 AND #11)                                                                                                                                                                                                  | 858     |
| #13 | Search pubmednotmedline [sb] OR pmcbook OR (publisher [sb] AND (pubstatusnihms OR pubstatuspmcsd))                                                                                                                   | 2179932 |
| #14 | Search (#13 AND #12)                                                                                                                                                                                                 | 63      |
| #15 | Search (#14) AND ("2000"[Date - Publication] : "2017"[Date - Publication])                                                                                                                                           | 57      |
| #16 | Search #15 AND ("english"[Language] OR "german"[Language])                                                                                                                                                           | 56      |

ProQuest Dissertations & Theses Global 16 Jan 2018

| Query                                                                                                                                                                                                                                                                                                                                                                                                                                                                          | Results |
|--------------------------------------------------------------------------------------------------------------------------------------------------------------------------------------------------------------------------------------------------------------------------------------------------------------------------------------------------------------------------------------------------------------------------------------------------------------------------------|---------|
| all(overweight OR obes* OR adipos* OR "body fat" OR "body composition" OR "fat distribution") AND (ti(BMI OR "body mass index" OR (waist AND (hip OR height OR circumference)) OR anthropometr*) OR su(BMI OR "body mass index" OR (waist AND (hip OR height OR circumference)) OR anthropometr*)) AND all(tomograph* OR "magnetic resonance imaging" OR MRI OR absorptiometry OR DXA OR DEXA OR ultrasound OR Ultrasonograph* OR predict* OR diagnos* OR accura* OR validat*) |         |
| Limits - Date: After December 31 1999; Language: German, English                                                                                                                                                                                                                                                                                                                                                                                                               | 360     |

WorldCat dissertations and theses 16 Jan 2018

| Search | Query | Results |
|--------|-------|---------|
|        |       |         |

|   |                                                                                                                                                                                                                                                                                                                                                                                                                                                                                                                                          |     |
|---|------------------------------------------------------------------------------------------------------------------------------------------------------------------------------------------------------------------------------------------------------------------------------------------------------------------------------------------------------------------------------------------------------------------------------------------------------------------------------------------------------------------------------------------|-----|
| 1 | WorldCat dissertations and theses results for: (kw: overweight OR kw: obes* OR kw: adipos* OR kw: body w fat OR kw: body w composition OR kw: fat w distribution) and (ti: BMI OR ti: body w mass w index OR (ti: waist AND (ti: hip OR ti: height OR ti: circumference)) OR ti: anthropometr*) and (kw: tomograph* OR kw: magnetic w resonance w imaging OR kw: MRI OR kw: absorptiometry OR kw: DXA OR kw: DEXA OR kw: ultrasound OR kw: Ultrasonograph* OR kw: predict* OR kw: diagnos* OR kw: accura* OR kw: validat*) and la= "eng" | 231 |
| 2 | (kw: overweight OR kw: obes* OR kw: adipos* OR kw: body w fat OR kw: body w composition OR kw: fat w distribution) and (ti: BMI OR ti: body w mass w index OR (ti: waist AND (ti: hip OR ti: height OR ti: circumference)) OR ti: anthropometr*) and (kw: tomograph* OR kw: magnetic w resonance w imaging OR kw: MRI OR kw: absorptiometry OR kw: DXA OR kw: DEXA OR kw: ultrasound OR kw: Ultrasonograph* OR kw: predict* OR kw: diagnos* OR kw: accura* OR kw: validat*) and yr: 2000-2018 and la= "ger" .                            | 3   |
| 3 | (kw: overweight OR kw: obes* OR kw: adipos* OR kw: body w fat OR kw: body w composition OR kw: fat w distribution) and (su: BMI OR su: body w mass w index OR (su: waist AND (su: hip OR su: height OR su: circumference)) OR su: anthropometr*) and (kw: tomograph* OR kw: magnetic w resonance w imaging OR kw: MRI OR kw: absorptiometry OR kw: DXA OR kw: DEXA OR kw: ultrasound OR kw: Ultrasonograph* OR kw: predict* OR kw: diagnos* OR kw: accura* OR kw: validat*) and yr: 2000-2018 and la= "eng" .                            | 171 |
| 4 | (kw: overweight OR kw: obes* OR kw: adipos* OR kw: body w fat OR kw: body w composition OR kw: fat w distribution) and (su: BMI OR su: body w mass w index OR (su: waist AND (su: hip OR su: height OR su: circumference)) OR su: anthropometr*) and (kw: tomograph* OR kw: magnetic w resonance w imaging OR kw: MRI OR kw: absorptiometry OR kw: DXA OR kw: DEXA OR kw: ultrasound OR kw: Ultrasonograph* OR kw: predict* OR kw: diagnos* OR kw: accura* OR kw: validat*) and yr: 2000-2018 and la= "ger"                              | 2   |
|   | Total                                                                                                                                                                                                                                                                                                                                                                                                                                                                                                                                    | 407 |



Supplementary file 2: Characteristics of included studies

**Table S1: Characteristics of included studies**

| Author, Year, Country, Funding                                                                                                        | Setting                           | Population<br>Number of participants<br>Mean age in years (SD)<br>Female<br>Ethnicity                                                                                             | Index test and cut-offs for obesity |                                                                                  |                                                                                  |                                                                                  | Reference test and cut-offs for obesity | Prevalence of obesity (%)                                                                                                                                                           | Risk of Bias |
|---------------------------------------------------------------------------------------------------------------------------------------|-----------------------------------|-----------------------------------------------------------------------------------------------------------------------------------------------------------------------------------|-------------------------------------|----------------------------------------------------------------------------------|----------------------------------------------------------------------------------|----------------------------------------------------------------------------------|-----------------------------------------|-------------------------------------------------------------------------------------------------------------------------------------------------------------------------------------|--------------|
|                                                                                                                                       |                                   |                                                                                                                                                                                   | BMI (kg/m <sup>2</sup> )            | WC (cm)                                                                          | WHR                                                                              | WHtR (cm/m)                                                                      |                                         |                                                                                                                                                                                     |              |
| Aschner et al. <sup>57</sup> , 2011, Mexico, El Salvador, Venezuela, Colombia, Paraguay, partially financed by pharmaceutical company | Primary care                      | 457<br>Women: 45.9 (16.5)<br>Men: 44.8 (15)<br>60.8%<br>NR                                                                                                                        | NR                                  | Women: 80-93<br>Men: 90-102                                                      | NR                                                                               | NR                                                                               | CT (cm <sup>2</sup> )<br>VAT >100       | Women: 47.8<br>Men: 55.3                                                                                                                                                            | unclear      |
| Batsis et al. <sup>58</sup> , 2016, USA, public funding                                                                               | Community (NHANES)                | 4,984<br>NR<br>49.0%<br>NR                                                                                                                                                        | ≥30                                 | Women ≥88<br>Men ≥102                                                            | NR                                                                               | NR                                                                               | DXA (% BF)<br>Women ≥35<br>Men ≥25      | Women:<br>≥60 years : 89.1<br>60-69.9 years 91.7<br>70-79.9 years 90.9<br>80+years 80.7<br><br>Men:<br>≥60 years: 87.5<br>60-69.9 years 86.5<br>70-79.9 years 88.4<br>80+years 88.2 | low          |
| Blew et al. <sup>73</sup> , 2002, USA, public funding                                                                                 | Community-based study             | 317<br>54.8 (4.8)<br>100.0% (all postmenopausal)<br>87.7% White                                                                                                                   | ≥ 30                                | NR                                                                               | NR                                                                               | NR                                                                               | DXA (% BF)<br>Women: ≥35, 38, 40        | NR                                                                                                                                                                                  | high         |
| Carneiro Roriz et al. <sup>43,55,56</sup> , 2014, Brazil, public funding                                                              | University Hospital and Community | 191 -197 <sup>1</sup><br>Adult women (20-59 years): 39.93 (11.35)<br>Elderly women (≥60 years): 73.7 (8.11)<br>Adult men (20-59 years): 39.37 (13.08)<br>Elderly men (≥60 years): | NR                                  | Adult women: 92.3<br>Elderly women: 88.2<br>Adult men: 90.2<br>Elderly men: 92.2 | Adult women: 0.87<br>Elderly women: 0.88<br>Adult men: 0.93<br>Elderly men: 0.96 | Adult women: 0.59<br>Elderly women: 0.58<br>Adult men: 0.54<br>Elderly men: 0.55 | CT (cm <sup>2</sup> )<br>VAT ≥ 130      | Adult women: 12.5<br>Elderly women: 42.9<br><br>Adult men: 26.5<br>Elderly men: 62.2                                                                                                | unclear      |

<sup>1</sup> Number of participants included slightly differed between publications

| Author, Year, Country, Funding                                                          | Setting           | Population<br>Number of participants<br>Mean age in years (SD)<br>Female<br>Ethnicity                                | Index test and cut-offs for obesity                                     |                                                                                                                                                                                                 |     |             | Reference test and cut-offs for obesity                                                                                             | Prevalence of obesity (%)                 | Risk of Bias |
|-----------------------------------------------------------------------------------------|-------------------|----------------------------------------------------------------------------------------------------------------------|-------------------------------------------------------------------------|-------------------------------------------------------------------------------------------------------------------------------------------------------------------------------------------------|-----|-------------|-------------------------------------------------------------------------------------------------------------------------------------|-------------------------------------------|--------------|
|                                                                                         |                   |                                                                                                                      | BMI (kg/m <sup>2</sup> )                                                | WC (cm)                                                                                                                                                                                         | WHR | WHtR (cm/m) |                                                                                                                                     |                                           |              |
|                                                                                         |                   | 72.19 (8.39)<br>51%<br>NR                                                                                            |                                                                         |                                                                                                                                                                                                 |     |             |                                                                                                                                     |                                           |              |
| Chen et al. <sup>60</sup> , 2006, China, public funding                                 | Hospital          | 1,122<br>53.0 (4.0)<br>100 %<br>100% Chinese                                                                         | 1)WHO/IASO/<br>IOTF:<br><br>Obesity >25<br>(2) WGOC:<br><br>Obesity >28 | >80                                                                                                                                                                                             | NR  | NR          | <b>DXA (% BF)</b><br>Obesity >40                                                                                                    | NR                                        | low          |
| De Lorenzo et al. <sup>64</sup> , 2003, Italy, NR                                       | Community         | 890<br>Women: 46 (14)<br>Men: 41 (17)<br>61%<br>NR                                                                   | >30                                                                     | NR                                                                                                                                                                                              | NR  | NR          | <b>DXA (% BF)</b><br>Women >35<br>Men >25                                                                                           | Men: 27.2<br>Women: 46.0                  | high         |
| De Oliveira et al. <sup>62</sup> , 2014, Brazil, public funding                         | Community         | 300<br>51 (NR)<br>0%<br>NR                                                                                           | NR                                                                      | <b>WCNR:</b><br>Obesity: 89.4<br>Central obesity:<br>91.6<br><br><b>WCMD:</b><br><br>Obesity: 91.4<br>Central obesity:<br>93.8<br><br><b>WCUL:</b><br>Obesity: 93.4<br>Central Obesity:<br>95.6 | NR  | NR          | <b>DXA (% BF)</b><br>20<br>Obesity: 25<br>Central obesity:<br>75th percentile<br>of %abdominal<br>area fat in the<br>present sample | NR                                        | unclear      |
| Diniz et al. <sup>61</sup> , 2016, Brazil, partially financed by pharmaceutical company | Outpatient Clinic | 83 (42 Psoriasis, 41 Controls)<br>Psoriasis: 47.0 (NR)<br>Controls: 38 (NR)<br>Psoriasis: 41%<br>Controls: 46%<br>NR | >30                                                                     | NR                                                                                                                                                                                              | NR  | NR          | <b>DXA (% BF)</b><br>20-39 years:<br>Women: 39+<br>Men: 26+<br><br>40-59 years:<br>Women: 41+<br>Men: 29+                           | Total: 50.1<br>PSO: 44.4<br>Control: 58.3 | high         |

| Author, Year, Country, Funding                                | Setting                                         | Population<br>Number of participants<br>Mean age in years (SD)<br>Female<br>Ethnicity  | Index test and cut-offs for obesity                                          |                           |                             |                             | Reference test and cut-offs for obesity                                                  | Prevalence of obesity (%) | Risk of Bias |
|---------------------------------------------------------------|-------------------------------------------------|----------------------------------------------------------------------------------------|------------------------------------------------------------------------------|---------------------------|-----------------------------|-----------------------------|------------------------------------------------------------------------------------------|---------------------------|--------------|
|                                                               |                                                 |                                                                                        | BMI (kg/m <sup>2</sup> )                                                     | WC (cm)                   | WHR                         | WHtR (cm/m)                 |                                                                                          |                           |              |
|                                                               |                                                 |                                                                                        |                                                                              |                           |                             |                             | 60-79 years:<br>Women: 43+<br>Men: 31+                                                   |                           |              |
| Donini et al. <sup>48</sup> , 2013, Italy, NR                 | Community and Clinical Rehabilitation Institute | 103<br>Women: 41.6 (10.2)<br>Men: 43.8 (8.1)<br>72%<br>NR                              | >30                                                                          | NR                        | NR                          | NR                          | <b>DXA (% BF)</b><br>Women ≥35<br>Men ≥ 25                                               | Women and men: 82.5       | high         |
| Evans et al. <sup>72</sup> , 2006, USA, public funding        | Outpatient care                                 | 296<br>65.86 (7.52)<br>100%<br>73% White, 27% Black                                    | >30                                                                          | NR                        | NR                          | NR                          | <b>DXA (% BF)</b><br>≥38                                                                 | Women: 46.0               | high         |
| Goh et al. <sup>51</sup> , 2004, Singapore, public funding    | Community                                       | 1069<br>Women: 48.4 (0.29)<br>Men: 49.4 (0.50)<br>72%<br>97% Chinese                   | ≥ 30                                                                         | Women ≥ 80.5<br>Men ≥92.5 | Women ≥ 0.826<br>Men ≥ 0.94 | Women ≥ 0.513<br>Men ≥ 0.55 | <b>DXA (% BF)</b><br>Women ≥35<br>Men ≥25                                                | Women: 13.1<br>Men: 5.7   | high         |
| Gong et al. <sup>47</sup> , 2007, China, public funding       | Physical Examination Center in hospital         | 72<br>48.96 (9.22)<br>39%<br>100% Mongolian                                            | Women 28.4<br>Men: 26.6                                                      | Women 93.5<br>Men: 95.0   | Women: 0.935<br>Men: 0.925  | NR                          | <b>MRI (cm<sup>2</sup>)</b><br>VAT ≥110                                                  | NR                        | unclear      |
| Grier et al. <sup>65</sup> , 2015, USA, NR                    | Army                                            | 110<br>23 (4.5)<br>0%<br>7% Caucasian, 3% Asian,<br>8% Black, 9% Hispanic,<br>6% Other | <21 years: 25.9<br>21–27 years: 26.5<br>28–39 years: 27.2<br>>40 years: 27.5 | NR                        | NR                          | NR                          | <b>DXA (%BF)</b><br><21 years: 20<br>21–27 years: 22<br>28–39 years: 24<br>>40 years: 26 | Men: 28.2                 | unclear      |
| Guimaraes et al. <sup>59</sup> , 2017, Brazil, public funding | Hospital or primary care                        | 82<br>55.24 (10.77)<br>100% (with rheumatoid arthritis)<br>NR                          | ≥ 23 - 30                                                                    | ≥80 - 86                  | NR                          | NR                          | <b>DXA (% BF)</b><br>39-43                                                               | Women: 59.8               | unclear      |
| Horie et al. <sup>68</sup> , 2006, Japan, NR                  | Community                                       | 516<br>NR<br>0%<br>100% Japanese                                                       | ≥25                                                                          | NR                        | NR                          | NR                          | <b>CT (cm<sup>2</sup>)</b><br>VAT ≥ 100                                                  | Men: 47.1                 | high         |

| Author, Year, Country, Funding                             | Setting                        | Population<br>Number of participants<br>Mean age in years (SD)<br>Female<br>Ethnicity                                                                                                                          | Index test and cut-offs for obesity |                 |                  |             | Reference test and cut-offs for obesity                                                                         | Prevalence of obesity (%) | Risk of Bias |
|------------------------------------------------------------|--------------------------------|----------------------------------------------------------------------------------------------------------------------------------------------------------------------------------------------------------------|-------------------------------------|-----------------|------------------|-------------|-----------------------------------------------------------------------------------------------------------------|---------------------------|--------------|
|                                                            |                                |                                                                                                                                                                                                                | BMI (kg/m <sup>2</sup> )            | WC (cm)         | WHR              | WHtR (cm/m) |                                                                                                                 |                           |              |
| Jia et al. <sup>49</sup> , 2003, China, NR                 | Outpatient department hospital | 690<br>Women <100cm <sup>3</sup> VAT: 51.4 (10.0)<br>Women ≥100cm <sup>3</sup> VAT: 57.9 (10.1)<br>Men <100cm <sup>3</sup> VAT: 54.4 (11.5)<br>Men ≥100cm <sup>3</sup> VAT: 59.0 (10.2)<br>56%<br>100% Chinese | 23-30                               | 70-105          | 0.83- 0.97       | NR          | <b>MRI (cm<sup>2</sup>)</b><br>VAT ≥ 100                                                                        | Women: 37.1<br>Men: 43.3  | high         |
| Kagawa et al. <sup>71</sup> , 2006, Japan, NR              | NR                             | 139<br>20.4 (1.3)<br>100%<br>100% Japanese                                                                                                                                                                     | ≥23                                 | NR              | NR               | NR          | <b>DXA (% BF)</b><br>>30                                                                                        | Women: 32.2               | unclear      |
| Karlage et al. <sup>54</sup> , 2015, USA, public funding   | Hospital-based cohort study    | 1361<br>32.4 (7.7)<br>50%<br>88% White                                                                                                                                                                         | ≥30                                 | NR              | NR               | ≥0.5        | <b>DXA (% BF)</b><br>Women ≥30<br>Men ≥25                                                                       | Women: 84.8<br>Men: 63.1  | unclear      |
| Katz et al. <sup>50</sup> , 2011, USA, public funding      | Clinical Research Center       | 145 women with systemic lupus erythematosus<br>47.9 (12.2)<br>100%<br>55% White, 10% Hispanic, 15% Black, 12% Asian                                                                                            | ≥30<br>≥26.4<br>≥26.8               | ≥ 88<br>≥ 84.75 | ≥ 0.85<br>≥ 0.80 | NR          | <b>DXA (% BF)</b><br>According to Gallagher *<br>(different age and ethnicity categories)                       | Women: 49.7               | high         |
| Marwaha et al. <sup>75</sup> , 2014, India, public funding | Community                      | 2347<br>49.1 (18.2)<br>61%<br>100% Indian                                                                                                                                                                      | >23 - >30                           | NR              | NR               | NR          | <b>DXA (% BF)</b><br>Women:<br>20–39 years: 39<br>40–59 years: 40<br>Men:<br>20–39 years: 25<br>40–59 years: 28 | Women and men: 84.4       | unclear      |

| Author, Year, Country, Funding                                      | Setting            | Population<br>Number of participants<br>Mean age in years (SD)<br>Female<br>Ethnicity                | Index test and cut-offs for obesity |                                                 |                         |                          | Reference test and cut-offs for obesity                                                   | Prevalence of obesity (%)                                                     | Risk of Bias |
|---------------------------------------------------------------------|--------------------|------------------------------------------------------------------------------------------------------|-------------------------------------|-------------------------------------------------|-------------------------|--------------------------|-------------------------------------------------------------------------------------------|-------------------------------------------------------------------------------|--------------|
|                                                                     |                    |                                                                                                      | BMI (kg/m <sup>2</sup> )            | WC (cm)                                         | WHR                     | WHtR (cm/m)              |                                                                                           |                                                                               |              |
| Oreopoulos et al. <sup>52,53</sup> , 2010, Canada, public funding   | University Clinic  | 140 patients with systolic and/or diastolic chronic heart failure<br>63 (NR)<br>26%<br>90% Caucasian | >30                                 | Women >88<br>Men >102                           | NR                      | Women >61.5<br>Men >60.5 | <b>DXA (% BF)</b><br>According to Gallagher *<br>(different age and ethnicity categories) | Women and men: 44.3                                                           | low          |
| Peterson et al. <sup>66</sup> , 2014, USA, public funding           | Community (NHANES) | 852 adults with impaired mobility<br>Women: 53.09 (1.08)<br>Men: 53.94 (0.68)<br>53%<br>NR           | ≥ 24-31                             | NR                                              | NR                      | NR                       | <b>DXA (% BF)</b><br>Women ≥ 35<br>Men ≥25                                                | Women: 35.1<br>Men: 29.4                                                      | unclear      |
| Pongchaiyakul et al. <sup>70</sup> , 2006, Thailand, NR             | Community          | 847<br>Women: 50.5 (15.5)<br>Men: 49.3 (17.2)<br>60%<br>NR                                           | ≥ 30                                | NR                                              | NR                      | NR                       | <b>DXA (% BF)</b><br>Women ≥35<br>Men ≥25                                                 | Women: 39.4<br>Men: 18.9                                                      | low          |
| Pongchaiyakul et al. <sup>63</sup> , 2006, Thailand, public funding | Community          | 436<br>50 (16)<br>Women: 50.6 (15.9)<br>Men: 49.1 (17.1)<br>58%<br>100% Thai                         |                                     | Women:<br>≥ 84<br>≥ 88<br>Men:<br>≥ 93<br>≥ 102 | NR                      | NR                       | <b>DXA (% BF)</b><br>Women: > 35<br>Men: > 25                                             | Women: 44.0<br>Men: 8.3                                                       | low          |
| Rahman et al. <sup>77</sup> , 2010, USA, public funding             | Hospital           | 555<br>26.0 (4.0)<br>100%<br>34% White, 29% Black.<br>37% Hispanic                                   | ≥ 25.5-28.7<br>≥ 30                 | NR                                              | NR                      | NR                       | <b>DXA (% BF)</b><br>>35%                                                                 | Total: 63.1<br>White women: 58.7<br>Black women: 60.4<br>Hispanic women: 69.1 | unclear      |
| Ribeiro-Filho et al. <sup>45</sup> , 2003, Brazil, public funding   | Outpatient Clinic  | 100<br>50.4 (7.7)<br>100%<br>NR                                                                      | NR                                  | Women ≥88<br>Men ≥102                           | Women >0.85<br>Men >1.0 | NR                       | <b>CT (cm<sup>2</sup>)</b><br>VAT ≥ 130                                                   | NR                                                                            | unclear      |
| Sardinha et al. <sup>76</sup> , 2000, Portugal, NR                  | Community          | 383<br>60.5 (7.1)<br>100%<br>100%                                                                    | >30                                 | NR                                              | NR                      | NR                       | <b>DXA (% BF)</b><br>>35                                                                  | Women: 89.3                                                                   | high         |

| Author, Year, Country, Funding                                  | Setting                  | Population<br>Number of participants<br>Mean age in years (SD)<br>Female<br>Ethnicity | Index test and cut-offs for obesity                                                                |                                                                                                    |                                                                                                    |             | Reference test and cut-offs for obesity                                                                         | Prevalence of obesity (%) | Risk of Bias |
|-----------------------------------------------------------------|--------------------------|---------------------------------------------------------------------------------------|----------------------------------------------------------------------------------------------------|----------------------------------------------------------------------------------------------------|----------------------------------------------------------------------------------------------------|-------------|-----------------------------------------------------------------------------------------------------------------|---------------------------|--------------|
|                                                                 |                          |                                                                                       | BMI (kg/m <sup>2</sup> )                                                                           | WC (cm)                                                                                            | WHR                                                                                                | WHtR (cm/m) |                                                                                                                 |                           |              |
| Tello-Winniczuk et al. <sup>69</sup> , 2017, Mexico, NR         | University Hospital      | 101 patients with rheumatoid arthritis<br>50.54 (12.3)<br>96%<br>NR                   | ≥22<br>≥24<br>≥25<br>≥30                                                                           | NR                                                                                                 | NR                                                                                                 | NR          | <b>DXA (% BF)</b><br>≥35                                                                                        | Women and men:<br>92.1    | unclear      |
| Temple et al. <sup>74</sup> , 2010, Canada, public funding      | Outpatient care          | 46 with mild to moderate intellectual disability<br>33.9 (10.2)<br>46%<br>100% White  | >23->30                                                                                            | NR                                                                                                 | NR                                                                                                 | NR          | <b>DXA (% BF)</b><br>Women:<br>20-39 years: 39<br>40-59 years: 40<br>Men:<br>20-39 years: 25<br>40-59 years: 28 | Women and men:<br>62.8    | unclear      |
| Vasconcelos et al. <sup>67</sup> , 2010, Brazil, public funding | Community                | 180<br>Women: 67.2 (5.2)<br>Men: 69.14 (5.6)<br>67%<br>NR                             | >25<br>>27<br>>30                                                                                  | NR                                                                                                 | NR                                                                                                 | NR          | <b>DXA (% BF)</b><br>Women >32<br>Men >25                                                                       | Women: 95.8<br>Men: 31.6  | low          |
| Yang et al. <sup>44,46</sup> , 2006, China, public funding      | Community                | 1946 - 1988<br>Women: 26.8 (4.2)<br>Men: 26.9 (3.8)<br>44%<br>100% Chinese            | Women:<br>20-30 years: 19.6<br>31-45 years: 21.2<br>Men:<br>20-30 years: 23.5<br>31-45 years: 24.1 | Women:<br>20-30 years: 65.8<br>31-45 years: 71.4<br>Men:<br>20-30 years: 78.9<br>31-45 years: 82.4 | Women:<br>20-30 years: 0.74<br>31-45 years: 0.79<br>Men:<br>20-30 years: 0.85<br>31-45 years: 0.86 | NR          | <b>DXA (% BF)</b><br>Women >30<br>Men >25                                                                       | Women: 26.2<br>Men: 8.6   | unclear      |
| Yoon et al. <sup>78</sup> , 2015, Korea, public funding         | Community (Korea NHANES) | 6017<br>NR<br>51%<br>100% Korean                                                      | ≥25                                                                                                | NR                                                                                                 | NR                                                                                                 | NR          | <b>DXA (% BF)</b><br>Women: ≥ 35<br>Men: ≥ 25                                                                   | Women: 34.4<br>Men: 22.5  | high         |

% BF, Percentage Body Fat; BMI, Body Mass Index; CT, Computed Tomography; DXA, Dual-energy X-ray Absorptiometry; IASO, International Association for the Study of Obesity; IOTF, International Obesity Task Force; MRI, Magnetic Resonance Imaging; NHANES, National Health and Nutrition Examination Survey; NR, Not Reported; SD, Standard Deviation; VAT, Visceral Adipose Tissue Area; WC, Waist Circumference; WCNR, Waist Circumference at the Narrowest Waist; WCMD, Waist Circumference at the Midpoint between the Superior Border of the Iliac Crest and the Inferior Margin of the Rib; WCUL, Waist Circumference at the Umbilical Line; WHO, World Health Organization; WHR, Waist-Hip Ratio; WHtR, Waist-Height Ratio; WGOC, Working Group on Obesity in China

\* Gallagher, D *et al.* Healthy percentage body fat ranges: An approach for developing guidelines based on body mass index. *Am.J.Clin.Nutr.* 7, 694-701 (2000)

Supplementary file 3: Detailed results for sensitivity and specificity for all four anthropometric tools (Tables 1-4)

**Table S1: Results for Body Mass Index to assess obesity (27 studies)**

| Author, year                          | Women                                                                                                                   |                                                                                                                         | Men                                                                              |                                                                                  | Women and Men combined                           |                                                  |
|---------------------------------------|-------------------------------------------------------------------------------------------------------------------------|-------------------------------------------------------------------------------------------------------------------------|----------------------------------------------------------------------------------|----------------------------------------------------------------------------------|--------------------------------------------------|--------------------------------------------------|
|                                       | Sensitivity                                                                                                             | Specificity                                                                                                             | Sensitivity                                                                      | Specificity                                                                      | Sensitivity                                      | Specificity                                      |
| Batsis et al., 2016 <sup>58</sup>     | ≥60 years: 0.77<br>60–69.9 years: 0.80<br>70–79.9 years: 0.79<br>80+ years: 0.66                                        | ≥60 years: 0.92<br>60–69.9 years: 0.91<br>70–79.9 years: 0.92<br>80+ years: 0.91                                        | ≥60 years: 0.81<br>60–69.9 years: 0.87<br>70–79.9 years: 0.80<br>80+ years: 0.63 | ≥60 years: 0.81<br>60–69.9 years: 0.76<br>70–79.9 years: 0.87<br>80+ years: 0.87 | NR                                               | NR                                               |
|                                       | ≥60 years: 0.39<br>60–69.9 years: 0.45<br>70–79.9 years: 0.38<br>80+ years: 0.23                                        | ≥60 years: 0.99<br>60–69.9 years: 1.00<br>70–79.9 years: 1.00<br>80+ years: 1.00                                        | ≥60 years: 0.33<br>60–69.9 years: 0.40<br>70–79.9 years: 0.31<br>80+ years: 0.15 | ≥60 years: 1.00<br>60–69.9 years: 0.99<br>70–79.9 years: 1.00<br>80+ years: 1.00 | NR                                               | NR                                               |
| Blew et al., 2002 <sup>73</sup>       | 35% BF: 0.20<br>38% BF: 0.26<br>40% BF: 0.29                                                                            | 35% BF: 1.00<br>38% BF: 0.99<br>40% BF: 0.99                                                                            | NR                                                                               | NR                                                                               | NR                                               | NR                                               |
| Chen et al., 2006 <sup>60</sup>       | Obesity ≥34% BF:<br>≥25: 0.75<br>≥28: 0.41                                                                              | Obesity ≥34% BF:<br>≥25: 0.71<br>≥28: 0.93                                                                              | NR                                                                               | NR                                                                               | NR                                               | NR                                               |
|                                       | Obesity ≥34% BF:<br>≥25: 0.61<br>≥28: 0.28                                                                              | Obesity ≥34% BF:<br>≥25: 0.76<br>≥28: 0.94                                                                              | NR                                                                               | NR                                                                               | NR                                               | NR                                               |
| De Lorenzo et al., 2003 <sup>64</sup> | ≥25: 0.70<br>≥30: 0.43                                                                                                  | ≥25: 0.80<br>≥30: 0.96                                                                                                  | ≥25: 0.83<br>≥30: 0.60                                                           | ≥25kg/m <sup>2</sup> : 0.86<br>≥30kg/m <sup>2</sup> : 0.93                       | NR                                               | NR                                               |
| Diniz et al. 2016 <sup>61</sup>       | NR                                                                                                                      | NR                                                                                                                      | NR                                                                               | NR                                                                               | Total: 0.38<br>Psoriasis: 0.44<br>Controls: 0.33 | Total: 0.92<br>Psoriasis: 0.94<br>Controls: 0.90 |
| Donini et al. 2013 <sup>48</sup>      | NR                                                                                                                      | NR                                                                                                                      | NR                                                                               | NR                                                                               | 0.48                                             | 1.00                                             |
| Evans et al. 2006 <sup>72</sup>       | 35% BF:<br>White: 0.47<br>Black: 0.53<br>38% BF:<br>White: 0.60<br>Black: 0.67<br>40% BF:<br>White: 0.71<br>Black: 0.72 | 35% BF:<br>White: 1.00<br>Black: 1.00<br>38% BF:<br>White: 0.97<br>Black: 0.86<br>40% BF:<br>White: 0.93<br>Black: 0.78 | NR                                                                               | NR                                                                               | NR                                               | NR                                               |
| Goh et al., 2004 <sup>51</sup>        | ≥25: 0.61<br>≥30: 0.13                                                                                                  | ≥25: 0.90<br>≥30: 0.95                                                                                                  | ≥27: 0.47<br>≥30: 0.07                                                           | ≥27: 0.89<br>≥30: 0.97                                                           | NR                                               | NR                                               |
| Gong et al., 2007 <sup>47</sup>       | 0.85                                                                                                                    | 0.86                                                                                                                    | 0.73                                                                             | 0.80                                                                             | NR                                               | NR                                               |

|                                                |                                                               |                                                               |                                                                                               |                                                                                               |      |      |
|------------------------------------------------|---------------------------------------------------------------|---------------------------------------------------------------|-----------------------------------------------------------------------------------------------|-----------------------------------------------------------------------------------------------|------|------|
| Grier et al. 2015 <sup>65</sup>                | NR                                                            | NR                                                            | ≥25: 0.60<br>≥25.9–27.5: 0.77<br>≥28.3: 0.90                                                  | ≥25: 1.00<br>≥25.9–27.5: 1.00<br>≥28.3: 0.96                                                  | NR   | NR   |
| Guimaraes et al. 2017 <sup>59</sup>            | ≥23: 0.92<br>≥25: 0.82<br>≥30: 0.37                           | ≥23: 0.36<br>≥25: 0.58<br>≥30: 0.76                           | NR                                                                                            | NR                                                                                            | NR   | NR   |
| Horie et al. 2006 <sup>68</sup>                | NR                                                            | NR                                                            | ≥23: 0.90<br>≥23.5: 0.83<br>≥24: 0.77<br>≥24.5: 0.70<br>≥25: 0.66<br>≥25.5: 0.57<br>≥26: 0.45 | ≥23: 0.54<br>≥23.5: 0.66<br>≥24: 0.74<br>≥24.5: 0.80<br>≥25: 0.84<br>≥25.5: 0.88<br>≥26: 0.91 | NR   | NR   |
| Jia et al., 2003 <sup>49</sup>                 | ≥25: 0.86<br>≥26 (optimal threshold): 0.76<br>≥30: 0.35       | ≥25: 0.62<br>≥26 (optimal threshold): 0.74<br>≥30: 0.95       | ≥25: 0.81<br>≥26 (optimal threshold): 0.69<br>≥30: 0.24                                       | ≥25: 0.70<br>≥26 (optimal threshold): 0.84<br>≥30: 0.99                                       | NR   | NR   |
| Kagawa et al. 2006 <sup>71</sup>               | ≥23: 0.40<br>≥25: 0.09                                        | ≥23: 0.95<br>≥25: 0.99                                        | NR                                                                                            | NR                                                                                            | NR   | NR   |
| Karlage et al., 2015 <sup>54</sup>             | 0.47                                                          | 1.00                                                          | 0.54                                                                                          | 0.94                                                                                          | NR   | NR   |
| Katz et al., 2011 <sup>50</sup>                | ≥26.4: 0.83<br>≥26.8: 0.80<br>≥30: 0.59                       | ≥26.4: 0.93<br>≥26.8: 0.95<br>≥30: 1.00                       | NR                                                                                            | NR                                                                                            | NR   | NR   |
| Marwaha et al. 2014 <sup>75</sup>              | ≥23: 0.92<br>≥25: 0.89<br>≥30: 0.92                           | ≥23: 0.69<br>≥25: 0.73<br>≥30: 0.75                           | ≥23: 0.78<br>≥25: 0.87<br>≥30: 0.89                                                           | ≥23: 0.61<br>≥25: 0.65<br>≥30: 0.64                                                           | NR   | NR   |
| Oreopoulos et al. 2010 & 2011 <sup>52,53</sup> | NR                                                            | NR                                                            | NR                                                                                            | NR                                                                                            | 0.61 | 0.82 |
| Peterson et al. 2014 <sup>66</sup>             | ≥25: 0.84<br>≥30: 0.53                                        | ≥25: 0.86<br>≥30: 0.98                                        | ≥25: 0.90<br>≥30: 0.47                                                                        | ≥25: 0.76<br>≥30: 1.00                                                                        | NR   | NR   |
| Pongchaiyakul et al. 2006 <sup>70</sup>        | ≥25: 0.70<br>≥30: 0.21                                        | ≥25: 0.84<br>≥30: 0.99                                        | ≥27: 0.44<br>≥30: 0.13                                                                        | ≥27: 0.95<br>≥30: 0.99                                                                        | NR   | NR   |
| Rahman et al. 2010 <sup>77</sup>               | White: 0.48<br>Black: 0.75<br>Hispanic: 0.54<br>Overall: 0.58 | White: 1.00<br>Black: 0.97<br>Hispanic: 0.98<br>Overall: 0.99 | NR                                                                                            | NR                                                                                            | NR   | NR   |
| Sardinha et al. 2000 <sup>76</sup>             | ≥25.5: 0.74<br>≥30: 0.27                                      | ≥25.5: 0.92<br>≥30: 1.00                                      | NR                                                                                            | NR                                                                                            | NR   | NR   |



|                                                     |                                                                                                                      |                                                                                                                      |                                                                                                                      |                                                                                                                    |                                                                                                                                        |                                                                                                                                     |
|-----------------------------------------------------|----------------------------------------------------------------------------------------------------------------------|----------------------------------------------------------------------------------------------------------------------|----------------------------------------------------------------------------------------------------------------------|--------------------------------------------------------------------------------------------------------------------|----------------------------------------------------------------------------------------------------------------------------------------|-------------------------------------------------------------------------------------------------------------------------------------|
| Tello-Winniczuk et al. 2017 <sup>69</sup>           | NR                                                                                                                   | NR                                                                                                                   | NR                                                                                                                   | NR                                                                                                                 | 22: (>35% AF): 0.97<br>24: (>40% BF): 0.90<br>25: (>35% BF): 0.86<br>30: (>35% AF): 0.43<br>30: (>40% BF): 0.46<br>30: (>35% BF): 0.42 | 22: (>35% AF) 0.84<br>24: (>40% BF) 0.75<br>25: (>35% BF) 0.39<br>30: (>35% AF): 1.00<br>30: (>40% BF): 0.89<br>30: (>35% BF): 1.00 |
| Temple et al. 2010 <sup>74</sup>                    | NR                                                                                                                   | NR                                                                                                                   | NR                                                                                                                   | NR                                                                                                                 | ≥25: 0.86<br>≥26 (optimal threshold): 0.86<br>≥30: 0.57                                                                                | ≥25: 0.71<br>≥26 (optimal threshold): 0.88<br>≥30: 1.00                                                                             |
| Vasconcelos et al. 2010 <sup>67</sup>               | ≥25: 0.76<br>≥27: 0.56<br>≥30: 0.28                                                                                  | ≥25: 1.00<br>≥27: 1.00<br>≥30: 1.00                                                                                  | ≥25: 0.5<br>≥27: 0.74<br>≥30: 0.32                                                                                   | ≥25: 0.40<br>≥27: 0.73<br>≥30: 0.98                                                                                | NR                                                                                                                                     | NR                                                                                                                                  |
| Yang et al. 2006 & Li et al., 2008 <sup>44,46</sup> | 20-30-years: 0.83<br>31-45 years: 0.86                                                                               | 20-30-years: 0.57<br>31-45 years: 0.66                                                                               | 20-30-years: 0.85<br>31-45 years: 0.85                                                                               | 20-30-years: 0.85<br>31-45 years: 0.76                                                                             | NR                                                                                                                                     | NR                                                                                                                                  |
| Yoon et al. 2015 <sup>78</sup>                      | Total: 0.72<br>20-29 years: 0.85<br>30-39 years: 0.72<br>40-49 years: 0.61<br>50-59 years: 0.66<br>60-69 years: 0.74 | Total: 0.84<br>20-29 years: 0.87<br>30-39 years: 0.87<br>40-49 years: 0.86<br>50-59 years: 0.78<br>60-69 years: 0.81 | Total: 0.56<br>20-29 years: 0.64<br>30-39 years: 0.51<br>40-49 years: 0.40<br>50-59 years: 0.39<br>60-69 years: 0.85 | Total: 89<br>20-29 years: 0.93<br>30-39 years: 0.84<br>40-49 years: 0.93<br>50-59 years: 0.87<br>60-69 years: 0.88 | NR                                                                                                                                     | NR                                                                                                                                  |

AF, Abdominal Fat; BF, Body Fat; NR, Not Reported;

**Table S2: Results for Waist Circumference to assess obesity (14 studies)**

| Author, year                       | Women                                                                                                                                                                |                                                                                                                                                                      | Men                                                                                                                                                         |                                                                                                                                                             | Women and Men combined |             |
|------------------------------------|----------------------------------------------------------------------------------------------------------------------------------------------------------------------|----------------------------------------------------------------------------------------------------------------------------------------------------------------------|-------------------------------------------------------------------------------------------------------------------------------------------------------------|-------------------------------------------------------------------------------------------------------------------------------------------------------------|------------------------|-------------|
|                                    | Sensitivity                                                                                                                                                          | Specificity                                                                                                                                                          | Sensitivity                                                                                                                                                 | Specificity                                                                                                                                                 | Sensitivity            | Specificity |
| Aschner, et al. 2011 <sup>57</sup> | 80: 0.92<br>81: 0.92<br>82: 0.90<br>83: 0.89<br>84: 0.87<br>85: 0.86<br>86: 0.84<br>87: 0.82<br>88: 0.82<br>89: 0.81<br>90: 0.79<br>91: 0.76<br>92: 0.73<br>93: 0.72 | 80: 0.35<br>81: 0.37<br>82: 0.40<br>83: 0.40<br>84: 0.43<br>85: 0.46<br>86: 0.49<br>87: 0.55<br>88: 0.59<br>89: 0.63<br>90: 0.68<br>91: 0.72<br>92: 0.75<br>93: 0.74 | 90: 0.98<br>91: 0.98<br>92: 0.95<br>93: 0.95<br>94: 0.90<br>95: 0.85<br>96: 0.79<br>97: 0.77<br>98: 0.75<br>99: 0.71<br>100: 0.66<br>101: 0.60<br>102: 0.55 | 90: 0.54<br>91: 0.59<br>92: 0.64<br>93: 0.75<br>94: 0.80<br>95: 0.83<br>96: 0.88<br>97: 0.90<br>98: 0.90<br>99: 0.90<br>100: 0.90<br>101: 0.93<br>102: 0.94 | NR                     | NR          |
| Batsis et al., 2016 <sup>58</sup>  | All: 0.82<br>≥60years: 0.81<br>60–69.9years: 0.81                                                                                                                    | All: 0.81<br>≥60years: 0.86<br>60–69.9years: 0.90                                                                                                                    | All: 0.74<br>≥60 years: 0.60<br>60–69.9 years: 0.65                                                                                                         | All: 0.89<br>≥60 years: 0.96<br>60–69.9 years: 0.96                                                                                                         | NR                     | NR          |

|                                                     |                                                                                                |                                                                                                |                                                                                                |                                                                                                |      |      |
|-----------------------------------------------------|------------------------------------------------------------------------------------------------|------------------------------------------------------------------------------------------------|------------------------------------------------------------------------------------------------|------------------------------------------------------------------------------------------------|------|------|
|                                                     | 70–79.9years: 0.82<br>80+ years: 0.77                                                          | 70–79.9years: 0.86<br>80+ years: 0.81                                                          | 70–79.9 years: 0.60<br>80+ years: 0.44                                                         | 70–79.9 years: 0.93<br>80+ years: 1.00                                                         |      |      |
| Carneiro Roriz et al., 2011 <sup>43</sup>           | Adult women: 0.83<br>Elderly women: 0.76                                                       | Adult women: 0.81<br>Elderly women: 0.69                                                       | Adult men: 0.87<br>Elderly men: 0.79                                                           | Adult men: 0.86<br>Elderly men: 0.78                                                           | NR   | NR   |
| Chen et al., 2006 <sup>60</sup>                     | ≥34% BF: 0.75<br>≥37% BF: 0.84<br>≥40% BF: 0.88                                                | ≥34% BF: 0.75<br>≥37% BF: 0.65<br>≥40% BF: 0.56                                                | NR                                                                                             | NR                                                                                             | NR   | NR   |
| De Oliveira, et al. 2014 <sup>62</sup>              | NR                                                                                             | NR                                                                                             | Obesity<br>WCNR: 0.85<br>WCMD: 0.84<br>WCUL: 0.85                                              | Obesity<br>WCNR: 0.84<br>WCMD: 0.82<br>WCUL: 0.85                                              | NR   | NR   |
|                                                     |                                                                                                |                                                                                                | Central Obesity<br>WCNR: 0.80<br>WCMD: 0.80<br>WCUL: 0.82                                      | Obesity<br>WCNR: 0.80<br>WCMD: 0.80<br>WCUL: 0.81                                              |      |      |
| Goh et al., 2004 <sup>51</sup>                      | 0.48                                                                                           | 0.90                                                                                           | 0.47                                                                                           | 0.89                                                                                           | NR   | NR   |
| Gong et al., 2007 <sup>47</sup>                     | 0.85                                                                                           | 0.73                                                                                           | 0.77                                                                                           | 0.65                                                                                           | NR   | NR   |
| Guimaraes et al. 2017 <sup>59</sup>                 | 80: 0.96<br>82: 0.92<br>86: 0.82                                                               | 80: 0.18<br>82: 0.27<br>86: 0.36                                                               | NR                                                                                             | NR                                                                                             | NR   | NR   |
| Jia et al., 2003 <sup>49</sup>                      | 70: 1.00<br>75: 1.00<br>80: 0.98<br>85: 0.95<br>90: 0.79<br>95: 0.13<br>100: 0.07<br>105: 0.03 | 70: 0.10<br>75: 0.21<br>80: 0.34<br>85: 0.57<br>90: 0.74<br>95: 0.87<br>100: 0.93<br>105: 0.97 | 70: 1.00<br>75: 1.00<br>80: 1.00<br>85: 0.96<br>90: 0.78<br>95: 0.47<br>100: 0.27<br>105: 0.15 | 70: 0.08<br>75: 0.18<br>80: 0.34<br>85: 0.58<br>90: 0.83<br>95: 0.94<br>100: 0.99<br>105: 0.99 | NR   | NR   |
| Katz et al., 2011 <sup>50</sup>                     | 84.75: 0.85<br>88: 0.74                                                                        | 84.75: 0.89<br>88: 0.90                                                                        | NR                                                                                             | NR                                                                                             | NR   | NR   |
| Oreopoulos et al. 2010 & 2011 <sup>52,53</sup>      | NR                                                                                             | NR                                                                                             | NR                                                                                             | NR                                                                                             | 0.90 | 0.60 |
| Pongchaiyakul et al. 2006 <sup>63</sup>             | 84: 0.67<br>88: 0.49                                                                           | 84: 0.87<br>88: 0.95                                                                           | 93: 0.47<br>102: 0.20                                                                          | 93: 0.98<br>102: 1.00                                                                          | NR   | NR   |
| Ribeiro-Filho et al. 2003 <sup>45</sup>             | 0.83                                                                                           | 0.61                                                                                           | NR                                                                                             | NR                                                                                             | NR   | NR   |
| Yang et al. 2006 & Li et al., 2008 <sup>44,46</sup> | 20-30-years: 0.78<br>31-45 years: 0.78                                                         | 20-30-years: 0.65<br>31-45 years: 0.78                                                         | 20-30-years: 0.94<br>31-45 years: 0.85                                                         | 20-30-years: 0.76<br>31-45 years: 0.73                                                         | NR   | NR   |

BF, Body Fat; NR, Not Reported; WCNR, Waist Circumference at the Narrowest Waist; WCMD, Waist Circumference at the Midpoint between the Superior Border of the Iliac Crest and the Inferior Margin of the Rib; WCUL, Waist Circumference at the Umbilical Line

**Table S3: Results for Waist to Hip Ratio to assess obesity (7 studies)**

| Author, year                                        | Women                                           |                                                 | Men                                    |                                        |
|-----------------------------------------------------|-------------------------------------------------|-------------------------------------------------|----------------------------------------|----------------------------------------|
|                                                     | Sensitivity                                     | Specificity                                     | Sensitivity                            | Specificity                            |
| Jia et al., 2003 <sup>49</sup>                      | 0.69                                            | 0.65                                            | 0.79                                   | 0.72                                   |
| Goh et al., 2004 <sup>51</sup>                      | 0.34                                            | 0.82                                            | 0.47                                   | 0.91                                   |
| Carneiro Roriz et al., 2011 <sup>43</sup>           | Adult women: 0.83<br>Elderly women: 0.67        | Adult women: 0.72<br>Elderly women: 0.52        | Adult men: 0.87<br>Elderly men: 0.83   | Adult men: 0.83<br>Elderly men: 0.83   |
| Katz et al., 2011 <sup>50</sup>                     | Original cut-off: 0.42<br>Revised cut-off: 0.69 | Original cut-off: 0.85<br>Revised cut-off: 0.67 | NR                                     | NR                                     |
| Gong et al., 2007 <sup>47</sup>                     | 0.92                                            | 0.46                                            | 0.82                                   | 0.25                                   |
| Ribeiro-Filho et al. 2003 <sup>45</sup>             | 0.79                                            | 0.64                                            | NR                                     | NR                                     |
| Yang et al. 2006 & Li et al., 2008 <sup>44,46</sup> | 20-30-years: 0.74<br>31-45 years: 0.69          | 20-30-years: 0.65<br>31-45 years: 0.79          | 20-30-years: 0.82<br>31-45 years: 0.89 | 20-30-years: 0.78<br>31-45 years: 0.64 |

NR, Not Reported;

**Table S4: Results for Waist to Height Ratio to assess obesity (4 studies)**

| Author, year                                                       | Women                                    |                                          | Men                                  |                                       | Women and Men combined |             |
|--------------------------------------------------------------------|------------------------------------------|------------------------------------------|--------------------------------------|---------------------------------------|------------------------|-------------|
|                                                                    | Sensitivity                              | Specificity                              | Sensitivity                          | Specificity                           | Sensitivity            | Specificity |
| Karlage et al., 2015 <sup>54</sup>                                 | 0.70                                     | 0.95                                     | 0.87                                 | 0.71                                  | NR                     | NR          |
| Goh et al., 2004 <sup>51</sup>                                     | 0.51                                     | 0.90                                     | 0.47                                 | 0.89                                  | NR                     | NR          |
| Carneiro Roriz et al., 2014 <sup>55</sup>                          | Adult women: 0.83<br>Elderly women: 0.81 | Adult women: 0.84<br>Elderly women: 0.79 | Adult men: 0.87<br>Elderly men: 0.86 | Adults men: 0.86<br>Elderly men: 0.82 | NR                     | NR          |
| Oreopoulos et al., 2010 & Oreopoulos et al., 2011 <sup>52,53</sup> | NR                                       | NR                                       | NR                                   | NR                                    | 0.77                   | 0.77        |

NR, Not Reported;

Supplementary file 4: Figures of subgroup analyses based on ethnicity, showing summary ROC curves (Figure S1) and paired forest plots for BMI and WC (Figure S2)

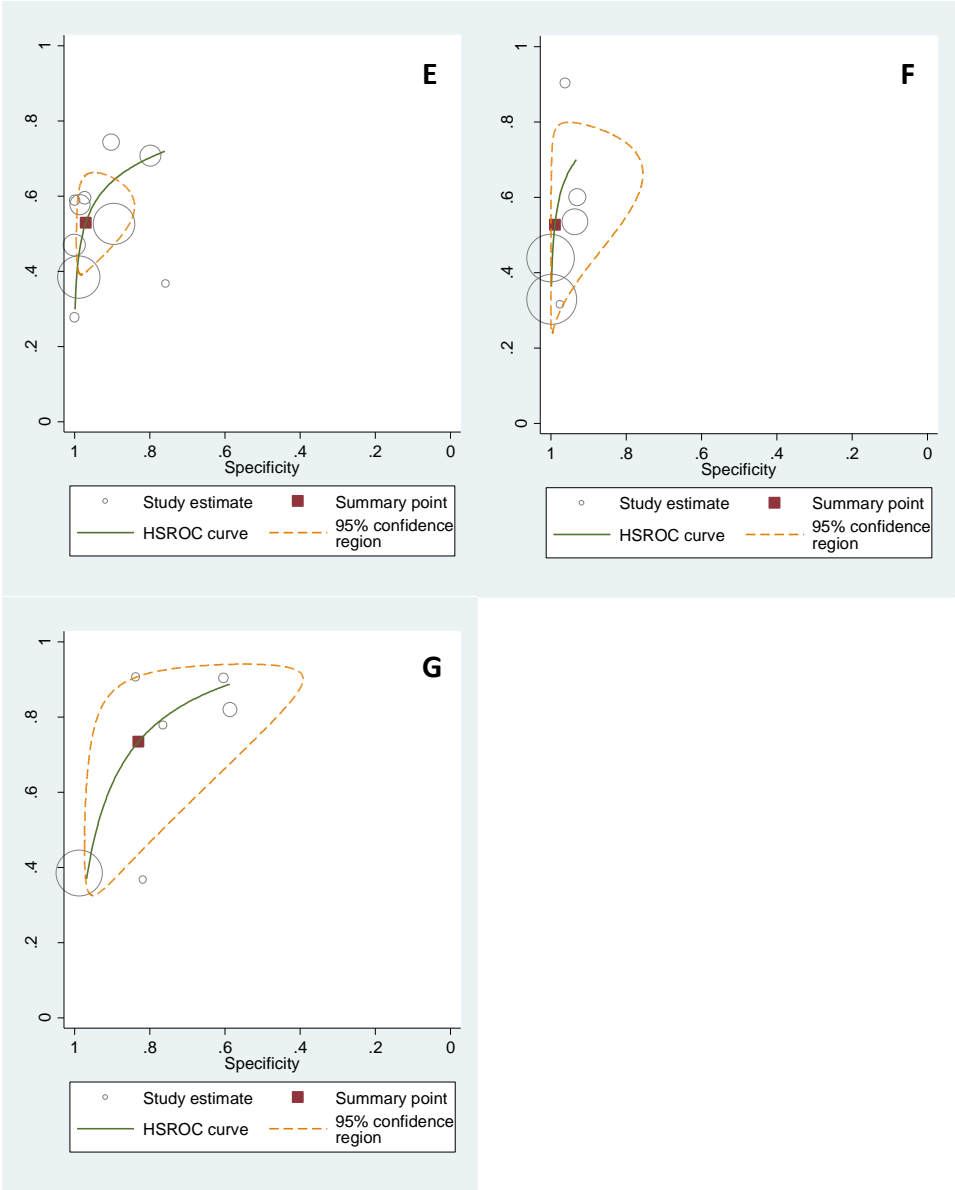

**Figure S1 Summary ROC Curve including summary point for Body Mass Index (BMI) in E) Women of White, Latin or Mixed Ethnicity (sensitivity: 52.9% [95% CI 43.8% to 61.9%]; specificity: 97.0% [95% CI 90.8% to 99.1%]), F) Men of White, Latin or Mixed Ethnicity (sensitivity: 52.8% [95%CI 36.4% to 68.6%],specificity: 98.9% [95%CI 93.8% to 99.8%]), and for Waist Circumference (WC) in G) White and Latin Women (sensitivity: 73.4% [95% CI 52.5% to 87.4%]; specificity: 83.0% [95% CI 62.7% to 93.4%])**

**BMI: White, Latin, and Mixed Women**

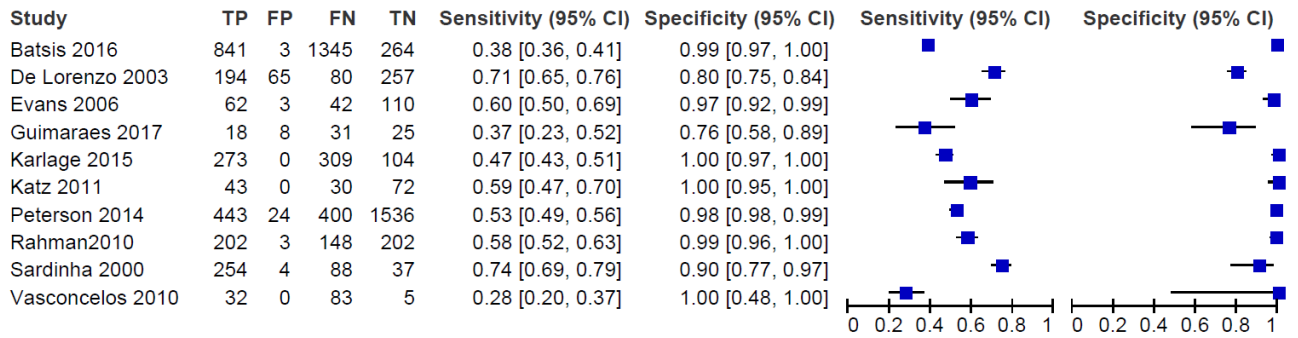

**WC White and Latin Women**

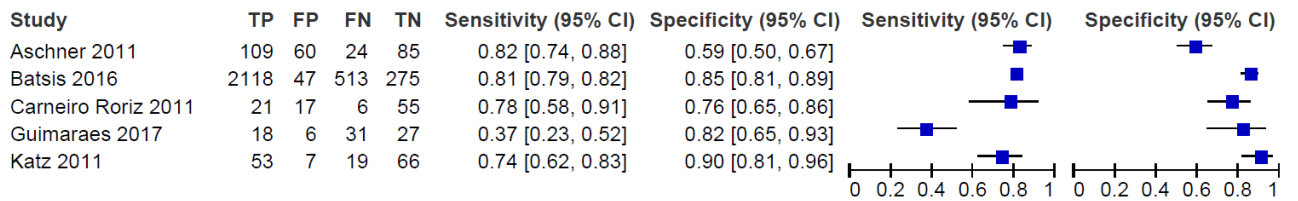

**BMI: White, Latin and Mixed Men**

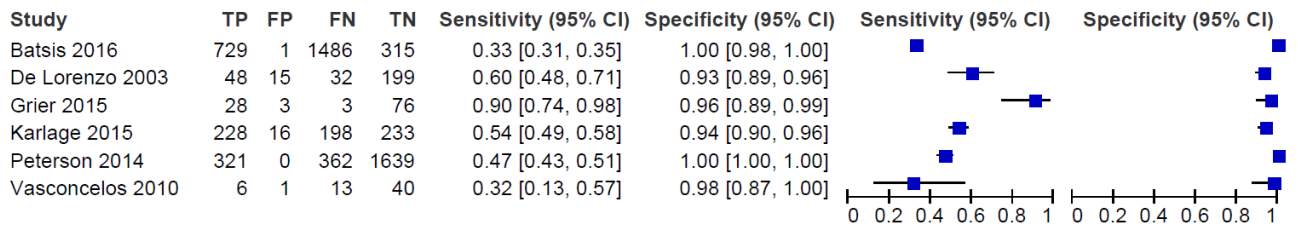

**Figure S2: Paired Forest-plots of Sensitivity and Specificity for Body Mass Index (BMI) and Waist Circumference (WC): Subgroup Analysis for Ethnicity; data not weighted**
